# Supplementary material for: Global reduction of snow cover in ski areas under climate change
Source: PubMed Central journal article supplement (PMC10936838; doi:10.1371/journal.pone.0299735), 2024-03-13
Supplement: pone.0299735.s001.pdf [file pone.0299735.s001.pdf]

| <b>Region</b>          | <b>Period</b> | <b>mean</b> | <b>median</b> | <b>CI (5%;95%)</b> |
|------------------------|---------------|-------------|---------------|--------------------|
| <b>All regions</b>     | Historical    | 216         | 214           | 124;344            |
|                        | Present       | 189         | 193           | 28;305             |
|                        | Future I      | 164         | 177           | 0;281              |
|                        | Future II     | 141         | 149           | 0;258              |
| <b>Andes</b>           | Historical    | 251         | 278           | 0;365              |
|                        | Present       | 226         | 252           | 0;365              |
|                        | Future I      | 181         | 206           | 0;365              |
|                        | Future II     | 153         | 176           | 0;322              |
| <b>Appalachian</b>     | Historical    | 174         | 180           | 110;216            |
|                        | Present I     | 156         | 162           | 90;198             |
|                        | Future I      | 139         | 152           | 0;182              |
|                        | Future II     | 116         | 136           | 0;167              |
| <b>Australian Alps</b> | Historical    | 150         | 158           | 60;201             |
|                        | Present       | 121         | 134           | 0;179              |
|                        | Future I      | 81          | 98            | 0;153              |
|                        | Future II     | 38          | 0             | 0;117              |
| <b>European Alps</b>   | Historical    | 218         | 216           | 132;328            |
|                        | Present       | 187         | 193           | 0;295              |
|                        | Future I      | 160         | 177           | 0;270              |
|                        | Future II     | 137         | 143           | 0;248              |
| <b>Japanese Alps</b>   | Historical    | 151         | 161           | 0;219              |
|                        | Present       | 134         | 150           | 0;209              |
|                        | Future I      | 108         | 132           | 0;196              |
|                        | Future II     | 86          | 101           | 0;180              |
| <b>Rocky Mountains</b> | Historical    | 258         | 251           | 184;365            |
|                        | Present       | 242         | 234           | 171;365            |
|                        | Future I      | 223         | 220           | 143;336            |
|                        | Future II     | 202         | 206           | 63;303             |
| <b>Southern Alps</b>   | Historical    | 240         | 241           | 153;348            |
|                        | Present       | 213         | 218           | 132;300            |
|                        | Future I      | 189         | 200           | 26;276             |
|                        | Future II     | 128         | 142           | 0;231              |
