# Supplementary material for: Global reduction of snow cover in ski areas under climate change
Source: PubMed Central journal article supplement (PMC10936838; doi:10.1371/journal.pone.0299735), 2024-03-13
Supplement: pone.0299735.s002.pdf [file pone.0299735.s002.pdf]

| <b>Region</b>          | <b>Period</b> | <b>mean</b> | <b>median</b> | <b>CI (5%;95%)</b> |
|------------------------|---------------|-------------|---------------|--------------------|
| <b>All regions</b>     | Historical    | 216         | 214           | 124;344            |
|                        | Present       | 192         | 189           | 87;309             |
|                        | Future I      | 161         | 169           | 0;279              |
|                        | Future II     | 131         | 142           | 0;253              |
| <b>Andes</b>           | Historical    | 251         | 278           | 0;365              |
|                        | Present       | 224         | 251           | 0;365              |
|                        | Future I      | 191         | 215           | 0;365              |
|                        | Future II     | 138         | 156           | 0;309              |
| <b>Appalachian</b>     | Historical    | 174         | 180           | 110;216            |
|                        | Present I     | 153         | 161           | 80;196             |
|                        | Future I      | 128         | 147           | 0;178              |
|                        | Future II     | 94          | 118           | 0;156              |
| <b>Australian Alps</b> | Historical    | 150         | 158           | 60;201             |
|                        | Present       | 128         | 141           | 0;180              |
|                        | Future I      | 76          | 94            | 0;152              |
|                        | Future II     | 20          | 0             | 0;105              |
| <b>European Alps</b>   | Historical    | 218         | 216           | 132;328            |
|                        | Present       | 190         | 188           | 92;297             |
|                        | Future I      | 158         | 167           | 0;272              |
|                        | Future II     | 129         | 140           | 0;247              |
| <b>Japanese Alps</b>   | Historical    | 151         | 161           | 0;219              |
|                        | Present       | 136         | 150           | 0;206              |
|                        | Future I      | 104         | 123           | 0;191              |
|                        | Future II     | 83          | 101           | 0;175              |
| <b>Rocky Mountains</b> | Historical    | 258         | 251           | 184;365            |
|                        | Present       | 242         | 234           | 165;365            |
|                        | Future I      | 219         | 218           | 133;329            |
|                        | Future II     | 182         | 194           | 0;296              |
| <b>Southern Alps</b>   | Historical    | 240         | 241           | 153;348            |
|                        | Present       | 216         | 222           | 138;301            |
|                        | Future I      | 181         | 190           | 0;273              |
|                        | Future II     | 110         | 124           | 0;233              |
