# Supplementary material for: Global reduction of snow cover in ski areas under climate change
Source: PubMed Central journal article supplement (PMC10936838; doi:10.1371/journal.pone.0299735), 2024-03-13
Supplement: pone.0299735.s003.pdf [file pone.0299735.s003.pdf]

| <b>Region</b>          | <b>Period</b> | <b>mean</b> | <b>median</b> | <b>CI (5%;95%)</b> |
|------------------------|---------------|-------------|---------------|--------------------|
| <b>All regions</b>     | Historical    | 216         | 214           | 124;344            |
|                        | Present       | 188         | 188           | 68;301             |
|                        | Future I      | 182         | 185           | 54;293             |
|                        | Future II     | 184         | 183           | 74;295             |
| <b>Andes</b>           | Historical    | 251         | 278           | 0;365              |
|                        | Present       | 227         | 252           | 0;365              |
|                        | Future I      | 226         | 249           | 0;365              |
|                        | Future II     | 217         | 246           | 0;365              |
| <b>Appalachian</b>     | Historical    | 174         | 180           | 110;216            |
|                        | Present I     | 151         | 160           | 77;193             |
|                        | Future I      | 145         | 157           | 54;189             |
|                        | Future II     | 142         | 155           | 26;188             |
| <b>Australian Alps</b> | Historical    | 150         | 158           | 60;201             |
|                        | Present       | 125         | 140           | 0;184              |
|                        | Future I      | 111         | 129           | 0;172              |
|                        | Future II     | 108         | 127           | 0;173              |
| <b>European Alps</b>   | Historical    | 218         | 216           | 132;328            |
|                        | Present       | 185         | 188           | 72;287             |
|                        | Future I      | 181         | 186           | 62;284             |
|                        | Future II     | 184         | 183           | 87;285             |
| <b>Japanese Alps</b>   | Historical    | 151         | 161           | 0;219              |
|                        | Present       | 131         | 147           | 0;206              |
|                        | Future I      | 122         | 142           | 0;198              |
|                        | Future II     | 122         | 138           | 0;198              |
| <b>Rocky Mountains</b> | Historical    | 258         | 251           | 184;365            |
|                        | Present       | 242         | 235           | 166;365            |
|                        | Future I      | 229         | 225           | 149;351            |
|                        | Future II     | 231         | 227           | 152;346            |
| <b>Southern Alps</b>   | Historical    | 240         | 241           | 153;348            |
|                        | Present       | 214         | 219           | 137;293            |
|                        | Future I      | 211         | 216           | 128;299            |
|                        | Future II     | 201         | 205           | 112;284            |
