# Supplementary material for: Global reduction of snow cover in ski areas under climate change
Source: PubMed Central journal article supplement (PMC10936838; doi:10.1371/journal.pone.0299735), 2024-03-13
Supplement: pone.0299735.s004.pdf [file pone.0299735.s004.pdf]

| Region                 | Timely comparison      | SSP5-8.5      |                  | SSP3-7.0      |                  | SSP1-2.6     |                  |
|------------------------|------------------------|---------------|------------------|---------------|------------------|--------------|------------------|
|                        |                        | mean          | p-value          | mean          | p-value          | mean         | p-value          |
| <b>All regions</b>     | Historical – present   | <b>-24.5</b>  | <b>&lt;0.001</b> | <b>-26.6</b>  | <b>&lt;0.001</b> | <b>-28.3</b> | <b>&lt;0.001</b> |
|                        | Historical – future I  | <b>-55.0</b>  | <b>&lt;0.001</b> | <b>-51.6</b>  | <b>&lt;0.001</b> | <b>-34.3</b> | <b>&lt;0.001</b> |
|                        | Historical – future II | <b>-85.0</b>  | <b>&lt;0.001</b> | <b>-74.6</b>  | <b>&lt;0.001</b> | <b>-32.5</b> | <b>&lt;0.001</b> |
|                        | Present – future I     | <b>-30.5</b>  | <b>&lt;0.001</b> | <b>-25.0</b>  | <b>&lt;0.001</b> | <b>-6.0</b>  | <b>&lt;0.001</b> |
|                        | Present – future II    | <b>-60.5</b>  | <b>&lt;0.001</b> | <b>-47.9</b>  | <b>&lt;0.001</b> | <b>-4.1</b>  | <b>&lt;0.001</b> |
|                        | Future I – future II   | <b>-30.0</b>  | <b>&lt;0.001</b> | <b>-22.9</b>  | <b>&lt;0.001</b> | 1.8          | 1.0              |
| <b>Andes</b>           | Historical – present   | -26.2         | 0.0536           | -24.2         | 0.0595           | -23.3        | 0.106            |
|                        | Historical – future I  | <b>-59.6</b>  | <b>&lt;0.001</b> | <b>-69.9</b>  | <b>&lt;0.001</b> | 24.9         | 0.053            |
|                        | Historical – future II | <b>-112.9</b> | <b>&lt;0.001</b> | <b>-97.6</b>  | <b>&lt;0.001</b> | <b>-33.3</b> | <b>0.005</b>     |
|                        | Present – future I     | <b>-33.4</b>  | <b>0.0023</b>    | <b>-45.7</b>  | <b>&lt;0.001</b> | -1.6         | 1.0              |
|                        | Present – future II    | <b>-86.7</b>  | <b>&lt;0.001</b> | <b>-73.4</b>  | <b>&lt;0.001</b> | -10.0        | 1.0              |
|                        | Future I – future II   | <b>-53.3</b>  | <b>&lt;0.001</b> | <b>-27.8</b>  | <b>0.0499</b>    | -8.4         | 1.0              |
| <b>Appalachian</b>     | Historical – present   | <b>-21.0</b>  | <b>&lt;0.001</b> | <b>-17.2</b>  | <b>&lt;0.001</b> | <b>-22.6</b> | <b>&lt;0.001</b> |
|                        | Historical – future I  | <b>-45.3</b>  | <b>&lt;0.001</b> | <b>-34.6</b>  | <b>&lt;0.001</b> | <b>-28.6</b> | <b>&lt;0.001</b> |
|                        | Historical – future II | <b>-79.3</b>  | <b>&lt;0.001</b> | <b>-57.3</b>  | <b>&lt;0.001</b> | <b>-32.1</b> | <b>&lt;0.001</b> |
|                        | Present – future I     | <b>-24.3</b>  | <b>&lt;0.001</b> | <b>-17.4</b>  | <b>&lt;0.001</b> | <b>-6.0</b>  | <b>&lt;0.001</b> |
|                        | Present – future II    | <b>-58.4</b>  | <b>&lt;0.001</b> | <b>-40.1</b>  | <b>&lt;0.001</b> | <b>-9.5</b>  | <b>&lt;0.001</b> |
|                        | Future I – future II   | <b>-34.1</b>  | <b>&lt;0.001</b> | <b>-22.7</b>  | <b>&lt;0.001</b> | -3.5         | 0.07292          |
| <b>Australian Alps</b> | Historical – present   | <b>-21.8</b>  | <b>&lt;0.001</b> | <b>-28.6</b>  | <b>&lt;0.001</b> | <b>-24.5</b> | <b>&lt;0.001</b> |
|                        | Historical – future I  | <b>-73.7</b>  | <b>&lt;0.001</b> | <b>-69.2</b>  | <b>&lt;0.001</b> | <b>-39.3</b> | <b>&lt;0.001</b> |
|                        | Historical – future II | <b>-129.9</b> | <b>&lt;0.001</b> | <b>-111.5</b> | <b>&lt;0.001</b> | <b>-42.2</b> | <b>&lt;0.001</b> |
|                        | Present – future I     | <b>-51.9</b>  | <b>&lt;0.001</b> | <b>-40.5</b>  | <b>&lt;0.001</b> | -14.8        | 0.27415          |
|                        | Present – future II    | <b>-108.1</b> | <b>&lt;0.001</b> | <b>-82.9</b>  | <b>&lt;0.001</b> | <b>-17.7</b> | <b>0.04763</b>   |
|                        | Future I – future II   | <b>-56.2</b>  | <b>&lt;0.001</b> | <b>-42.3</b>  | <b>&lt;0.001</b> | -2.9         | 1.0              |
| <b>European Alps</b>   | Historical – present   | <b>-27.7</b>  | <b>&lt;0.001</b> | <b>-30.8</b>  | <b>&lt;0.001</b> | <b>-32.4</b> | <b>&lt;0.001</b> |
|                        | Historical – future I  | <b>-60.1</b>  | <b>&lt;0.001</b> | <b>-57.3</b>  | <b>&lt;0.001</b> | <b>-36.5</b> | <b>&lt;0.001</b> |
|                        | Historical – future II | <b>-88.2</b>  | <b>&lt;0.001</b> | <b>-80.3</b>  | <b>&lt;0.001</b> | <b>-33.8</b> | <b>&lt;0.001</b> |
|                        | Present – future I     | <b>-32.4</b>  | <b>&lt;0.001</b> | <b>-26.5</b>  | <b>&lt;0.001</b> | <b>-4.1</b>  | <b>0.00264</b>   |
|                        | Present – future II    | <b>-60.6</b>  | <b>&lt;0.001</b> | <b>-49.5</b>  | <b>&lt;0.001</b> | <b>-1.4</b>  | <b>&lt;0.001</b> |
|                        | Future I – future II   | <b>-28.1</b>  | <b>&lt;0.001</b> | <b>-22.9</b>  | <b>&lt;0.001</b> | 2.7          | 1.0              |
| <b>Japanese Alps</b>   | Historical – present   | <b>-14.8</b>  | <b>&lt;0.001</b> | <b>-17.2</b>  | <b>&lt;0.001</b> | <b>-20.1</b> | <b>&lt;0.001</b> |
|                        | Historical – future I  | <b>-46.6</b>  | <b>&lt;0.001</b> | <b>-42.6</b>  | <b>&lt;0.001</b> | <b>-29.0</b> | <b>&lt;0.001</b> |
|                        | Historical – future II | <b>-67.7</b>  | <b>&lt;0.001</b> | <b>-64.4</b>  | <b>&lt;0.001</b> | <b>-29.2</b> | <b>&lt;0.001</b> |
|                        | Present – future I     | <b>-31.7</b>  | <b>&lt;0.001</b> | -25.4         | <b>&lt;0.001</b> | <b>-8.9</b>  | <b>&lt;0.001</b> |
|                        | Present – future II    | <b>-52.8</b>  | <b>&lt;0.001</b> | <b>-47.2</b>  | <b>&lt;0.001</b> | <b>-9.1</b>  | <b>&lt;0.001</b> |
|                        | Future I – future II   | <b>-21.1</b>  | <b>&lt;0.001</b> | <b>-21.8</b>  | <b>&lt;0.001</b> | 0.2          | 1.0              |
| <b>Rocky Mountains</b> | Historical – present   | <b>-16.1</b>  | <b>&lt;0.001</b> | <b>-16.1</b>  | <b>&lt;0.001</b> | <b>-16.5</b> | <b>&lt;0.001</b> |
|                        | Historical – future I  | <b>-38.9</b>  | <b>&lt;0.001</b> | <b>-35.1</b>  | <b>&lt;0.001</b> | <b>-29.7</b> | <b>&lt;0.001</b> |
|                        | Historical – future II | <b>-75.8</b>  | <b>&lt;0.001</b> | <b>-56.4</b>  | <b>&lt;0.001</b> | <b>-27.3</b> | <b>&lt;0.001</b> |
|                        | Present – future I     | <b>-22.8</b>  | <b>&lt;0.001</b> | <b>-19.0</b>  | <b>&lt;0.001</b> | <b>-13.2</b> | <b>&lt;0.001</b> |
|                        | Present – future II    | <b>-59.7</b>  | <b>&lt;0.001</b> | <b>-40.3</b>  | <b>&lt;0.001</b> | <b>-10.8</b> | <b>&lt;0.001</b> |
|                        | Future I – future II   | <b>-36.9</b>  | <b>&lt;0.001</b> | <b>-21.3</b>  | <b>&lt;0.001</b> | 2.5          | 0.1              |
| <b>Southern Alps</b>   | Historical – present   | -23.9         | 0.0508           | <b>-27.3</b>  | <b>0.019</b>     | <b>-26.1</b> | <b>0.01988</b>   |
|                        | Historical – future I  | <b>-59.8</b>  | <b>&lt;0.001</b> | <b>-51.0</b>  | <b>&lt;0.001</b> | <b>-29.4</b> | <b>0.00943</b>   |
|                        | Historical – future II | <b>-130.3</b> | <b>&lt;0.001</b> | <b>-112.3</b> | <b>&lt;0.001</b> | <b>-39.9</b> | <b>&lt;0.001</b> |
|                        | Present – future I     | <b>-35.8</b>  | <b>0.0033</b>    | -23.7         | 0.158            | -3.3         | 1.0              |
|                        | Present – future II    | <b>-106.4</b> | <b>&lt;0.001</b> | <b>-85.0</b>  | <b>&lt;0.001</b> | -13.7        | 0.64773          |
|                        | Future I – future II   | <b>-70.5</b>  | <b>&lt;0.001</b> | <b>-61.4</b>  | <b>&lt;0.001</b> | -10.5        | 1.0              |
