# Supplementary material for: Global reduction of snow cover in ski areas under climate change
Source: PubMed Central journal article supplement (PMC10936838; doi:10.1371/journal.pone.0299735), 2024-03-13
Supplement: pone.0299735.s005.pdf [file pone.0299735.s005.pdf]

| Region                 | Timely comparison      | SSP5 -8.5<br>% mean change;<br>CI (5;95) | SSP3-7.0<br>% mean change;<br>CI (5;95) | SSP1-2.6<br>% mean change;<br>CI (5;95) |
|------------------------|------------------------|------------------------------------------|-----------------------------------------|-----------------------------------------|
| <b>All regions</b>     | Historical – present   | -13.3 (-13.1; -13.4)                     | -15.2 (-14.9; -15.5)                    | -15.5 (-15.3; -15.7)                    |
|                        | Historical – future I  | -30.2 (-29.8; -30.5)                     | -28.7 (-28.3; -29.1)                    | -18.8 (-18.6; -19.1)                    |
|                        | Historical – future II | -45.0 (-44.6; -45.4)                     | -39.4 (-39.1; -39.8)                    | -17.3 (-17.1; -17.5)                    |
|                        | Present – future I     | -21.1 (-20.6; -21.5)                     | -18.0 (-17.7; -18.4)                    | -4.8 (-4.6; -5.0)                       |
|                        | Present – future II    | -38.2 (-37.8; -38.6)                     | -30.4 (-30.1; -30.8)                    | -1.8 (-1.7; -2.0)                       |
|                        | Future I – future II   | -24.6 (-24.2; -25.0)                     | -16.5 (-16.2; -16.7)                    | 2.3 (2.5; 2.2)                          |
| <b>Andes</b>           | Historical – present   | -13.9 (-10.8; -16.9)                     | -12.4 (-10.0; -14.9)                    | -12.1 (-9.5; -14.7)                     |
|                        | Historical – future I  | -27.8 (-24.3; -31.3)                     | -32.4 (-28.3; -36.6)                    | -12.8 (-10.2; -15.7)                    |
|                        | Historical – future II | -49.5 (-45.1; -53.4)                     | -43.3 (-39.2; -47.7)                    | -16.9 (-13.6; -20.2)                    |
|                        | Present – future I     | -17.8 (-15.2; -20.5)                     | -25.9 (-21.8; -29.9)                    | -1.4 (-0.1; -3.0)                       |
|                        | Present – future II    | -44.1 (-39.6; -48.5)                     | -38.5 (-34.2; -42.8)                    | -6.8 (-4.3; -9.2)                       |
|                        | Future I – future II   | -34.7 (-30.0; 39.4)                      | -19.4 (-16.2; -22.7)                    | -5.7 (-3.5; -8.0)                       |
| <b>Appalachian</b>     | Historical – present   | -13.9 (-13.1; -14.8)                     | -11.2 (-10.5; -11.8)                    | -14.7 (-13.9; -15.5)                    |
|                        | Historical – future I  | -29.9 (-28.5; -31.3)                     | -22.9 (21.7; -24.1)                     | -19.0 (-18.0; -19.9)                    |
|                        | Historical – future II | -50.1 (-48.5; -51.6)                     | -37.0 (35.6; -38.5)                     | -21.3 (-20.2; -22.3)                    |
|                        | Present – future I     | -19.6 (-18.3; -21.0)                     | -13.9 (-12.7; -15.0)                    | -5.6 (-4.9; -6.3)                       |
|                        | Present – future II    | -43.0 (-41.3; -44.6)                     | -29.8 (-28.3; -31.4)                    | -8.5 (-7.6; -9.4)                       |
|                        | Future I – future II   | -31.2 (-29.4; -32.8)                     | -19.3 (-17.9; -20.6)                    | -3.4 (-2.9; -4.0)                       |
| <b>Australian Alps</b> | Historical – present   | -16.3 (-13.9; -18.6)                     | -21.3 (-18.7; -23.9)                    | -19.3 (-15.4; -23.2)                    |
|                        | Historical – future I  | -54.4 (-48.7; -60.2)                     | -51.3 (-45.6; -57.0)                    | -30.6 (-25.3; -36.0)                    |
|                        | Historical – future II | -89.1 (-85.4; -92.8)                     | -78.2 (-73.6; -82.9)                    | -32.6 (-27.3; 37.9)                     |
|                        | Present – future I     | -47.6 (-41.1; -54.0)                     | -41.6 (-35.0; -48.1)                    | -16.5 (-11.3; -21.7)                    |
|                        | Present – future II    | -87.7 (-83.6; -91.9)                     | -74.6 (-69.2; -80.0)                    | -18.9 (-13.8; -24.0)                    |
|                        | Future I – future II   | -79.4 (-72.8; -85.9)                     | -59.7 (-52.4; -66.9)                    | -2.9 (-2.3; -3.5)                       |
| <b>European Alps</b>   | Historical – present   | -14.6 (-14.4; -14.8)                     | -17.4 (-17.1; -17.8)                    | -17.2 (-17.0; -17.5)                    |
|                        | Historical – future I  | -32.4 (-32.0; -32.8)                     | -31.6 (-31.1; -32.0)                    | -19.7 (-19.4; -20.0)                    |
|                        | Historical – future II | -46.4 (-45.9; -46.9)                     | -41.8 (-41.4; -42.2)                    | -17.4 (-17.2; -17.6)                    |
|                        | Present – future I     | -22.6 (-22.2; -23.0)                     | -19.6 (-19.1; -20.0)                    | -4.0 (-3.8; -4.3)                       |
|                        | Present – future II    | -39.1 (-38.6; -39.6)                     | -31.7 (-31.3; -32.0)                    | 0.3 (0.5; 0.2)                          |
|                        | Future I – future II   | -24.5 (-24.1; -25.0)                     | -16.3 (-16.1; -16.5)                    | 3.7 (4.0; 3.5)                          |
| <b>Japanese Alps</b>   | Historical – present   | -12.8 (-11.9; -13.8)                     | -15.3 (-14.1; -16.5)                    | -17.8 (-16.5; -19.1)                    |
|                        | Historical – future I  | -37.4 (-35.8; -39.1)                     | -35.1 (-33.3; -36.9)                    | -24.5 (-23.0; 26.1)                     |
|                        | Historical – future II | -51.7 (-50.0; 53.5)                      | -49.7 (-47.9; -51.4)                    | -24.2 (-22.9; -25.6)                    |
|                        | Present – future I     | -30.1 (-28.4; -31.8)                     | -25.5 (-23.7; -27.2)                    | -9.8 (-8.7; -11.0)                      |
|                        | Present – future II    | -46.3 (-44.5; -48.2)                     | -42.6 (-40.7; -44.4)                    | -8.9 (-8.1; -9.6)                       |
|                        | Future I – future II   | -26.9 (-25.1; -28.8)                     | -25.6 (-24.0; -27.2)                    | -1.3 (-1.0; -1.6)                       |
| <b>Rocky Mountains</b> | Historical – present   | -6.8 (-6.5; -7.2)                        | -6.7 (-6.4; -7.0)                       | -7.1 (-6.7; -7.4)                       |
|                        | Historical – future I  | -15.9 (-15.3; -16.4)                     | -14.3 (-13.9; -14.8)                    | -12.2 (-11.7; 12.6)                     |
|                        | Historical – future II | -30.5 (-30.0; -31.4)                     | -22.7 (-22.1; -23.4)                    | -11.2 (-10.7; -11.6)                    |
|                        | Present – future I     | -10.1 (-9.6; -10.6)                      | -8.5 (-8.0; -8.9)                       | -5.8 (-5.4; -6.1)                       |
|                        | Present – future II    | -25.9 (-24.9; -26.8)                     | -17.5 (-16.9; -18.2)                    | -4.7 (-4.3; -5.0)                       |
|                        | Future I – future II   | -18.6 (-17.7; -19.5)                     | -10.7 (-10.1; -11.2)                    | 1.1 (1.2; 0.9)                          |
| <b>Southern Alps</b>   | Historical – present   | -10.4 (-8.2; -12.5)                      | -11.9 (-9.7; -14.0)                     | -10.8 (-10.0; -11.6)                    |
|                        | Historical – future I  | -27.4 (-22.9; -31.8)                     | -23.1 (-19.5; -26.7)                    | -12.9 (10.9; 15.0)                      |
|                        | Historical – future II | -59.2 (-53.0; -65.5)                     | -50.9 (-45.4; -56.3)                    | -17.5 (-15.3; -19.6)                    |
|                        | Present – future I     | -19.1 (-14.5; -23.7)                     | -13.0 (-9.6; 16.5)                      | -2.6 (-0.3; -5.0)                       |
|                        | Present – future II    | -54.5 (-47.6; 61.4)                      | -44.5 (-38.4; -50.5)                    | -7.8 (-5.4; -10.1)                      |
|                        | Future I – future II   | -45.8 (-38.3; -53.4)                     | -38.4 (-32.1; -44.8)                    | -5.4 (-4.8; -5.9)                       |
